# Supplementary material for: Discrimination of Schizothorax grahami (Regan, 1904) Stocks Based on Otolith Morphology
Source: MDPI journal article supplement (doi:10.3390/fishes8100504), 2023-10-10
Supplement: s1 [file s1]

Table S1. Results of discriminant analysis between left and right otoliths

|               | Number | Accuracy% | Predicted result |               |
|---------------|--------|-----------|------------------|---------------|
|               |        |           | Left otolith     | Right otolith |
| Left otolith  | 102    | 54.9      | 56               | 46            |
| Right otolith | 102    | 54.9      | 46               | 56            |

Table S2. ANOVA results of different geographic stocks

| Shape index    | Group I                   | Group II                  | Group III                 |
|----------------|---------------------------|---------------------------|---------------------------|
| Roundness      | 5.830±2.036 <sup>a</sup>  | 4.543±2.952 <sup>a</sup>  | 4.922±4.103 <sup>a</sup>  |
| Format factor  | 0.863±0.024 <sup>a</sup>  | 0.864±0.034 <sup>a</sup>  | 0.866±0.032 <sup>a</sup>  |
| Circularity    | 14.569±0.432 <sup>a</sup> | 14.561±0.598 <sup>a</sup> | 14.420±0.525 <sup>a</sup> |
| Rectangularity | 0.767±0.022 <sup>a</sup>  | 0.768±0.019 <sup>a</sup>  | 0.770±0.019 <sup>a</sup>  |
| Ellipticity    | 0.151±0.030 <sup>b</sup>  | 0.166±0.034 <sup>a</sup>  | 0.136±0.035 <sup>b</sup>  |
| Radius ratio   | 1.792±0.150 <sup>b</sup>  | 1.898±0.198 <sup>a</sup>  | 1.779±0.188 <sup>b</sup>  |
| Feret ratio    | 1.130±0.022 <sup>b</sup>  | 1.143±0.030 <sup>a</sup>  | 1.119±0.028 <sup>b</sup>  |
| Aspect ratio   | 1.360±0.080 <sup>b</sup>  | 1.403±0.101 <sup>a</sup>  | 1.319±0.093 <sup>b</sup>  |

Note: The same superscripts mean the differences are not significant, different superscripts mean the differences are significant.

Table S3. Comparing otolith shape among three stocks using an ANOVA like permutation test

| Method         | df  | Var     | F      | P     |
|----------------|-----|---------|--------|-------|
| <b>Fourier</b> |     |         |        |       |
| Model          | 2   | 0.0511  | 3.5295 | 0.001 |
| Residual       | 116 | 0.83969 |        |       |
| <b>Wavelet</b> |     |         |        |       |
| Model          | 2   | 0.073   | 4.546  | 0.001 |
| Residual       | 116 | 0.93141 |        |       |
